# Supplementary material for: Prevalence of Tuberculosis, Drug Susceptibility Testing, and Genotyping of Mycobacterial Isolates from Pulmonary Tuberculosis Patients in Dessie, Ethiopia
Source: PubMed Central journal article supplement (PMC4477223; doi:10.1155/2015/215015), 2015-06-09
Supplement: 215015.f1.pdf [file 215015.f1.pdf]

Table S1: Supplementary material. Socio demographic and clinical characteristics of the study participants

| <u>Variable</u>                                 | <u>Number (%)</u> |
|-------------------------------------------------|-------------------|
| Gender                                          |                   |
| Male                                            | 80(55.6)          |
| Female                                          | 64(44.4)          |
| Age                                             |                   |
| 10-20                                           | 31(21.5)          |
| 21-30                                           | 66(45.8)          |
| 31-40                                           | 32(22.2)          |
| 41-78                                           | 15(10.4)          |
| Contact with TB patient                         |                   |
| Yes                                             | 29(20.1)          |
| No                                              | 115(79.9)         |
| History of previous TB treatment                |                   |
| Yes                                             | 16(11.1)          |
| No                                              | 128(88.9)         |
| Length of stay/cough before seeking health care |                   |
| 2 weeks                                         | 13(9)             |
| 3 weeks                                         | 33(23)            |
| 4 weeks                                         | 40(27.6)          |
| 5-10 weeks                                      | 31(21.5)          |
| > 10 weeks                                      | 27(18.7)          |

HIV status

Negative (N=119)

Male – No (N:R)<sup>a</sup> 70(48.6)

Female– No (N:R)<sup>a</sup> 49(34.0)

Positive (N=25)

Male – No (N:R)<sup>a</sup> 10(7:3) (6.94)

Female– No (N:R)<sup>a</sup> 15(13:2) (10.42)

<sup>a</sup> N = new case, R = Retreatment case

**Table S2, Supplementary material, new cases**  
**Drug susceptibility patterns by age, gender, residence and HIV status**

| No patients | Age   | Gender | Residence | HIV              | Drug susceptibility test result |     |     |     |
|-------------|-------|--------|-----------|------------------|---------------------------------|-----|-----|-----|
|             |       |        |           |                  | INH                             | RMP | STR | EMB |
| 1           | 13    | M      | U         | N                | S                               | S   | S   | Rt  |
| 18          | 14-20 | 8M,10F | 3U,15R    | N                | S                               | S   | S   | S   |
| 1           | 18    | M      | U         | N                | S                               | S   | Rt  | S   |
| 1           | 20    | F      | R         | N                | S                               | S   | S   | Rt  |
| 2           | 21    | M,F    | R         | N                | S                               | S   | S   | S   |
| 4           | 22    | 2M,2F  | 1U,3R     | N                | S                               | S   | S   | S   |
| 1           | 22    | M      | R         | N                | Rt                              | S   | S   | S   |
| 2           | 23    | M      | U,R       | N                | S                               | S   | S   | S   |
| 1           | 23    | M      | U         | N                | Rt                              | S   | Rt  | S   |
| 2           | 24    | M,F    | R         | N                | S                               | S   | S   | S   |
| 9           | 25    | 3M,6F  | 5U,4R     | N                | S                               | S   | S   | S   |
| 3           | 25    | 1M,2F  | 1U,2R     | <b>P (1M,2F)</b> | S                               | S   | S   | S   |
| 1           | 26    | F      | R         | N                | S                               | S   | S   | S   |
| 3           | 27    | M      | 1U,2R     | N                | S                               | S   | S   | S   |
| 1           | 27    | M      | U         | N                | S                               | S   | Rt  | S   |
| 1           | 27    | F      | R         | <b>P</b>         | S                               | S   | S   | S   |
| 6           | 28    | 3M,3F  | 4U,2R     | N                | S                               | S   | S   | S   |
| 1           | 28    | M      | R         | N                | Rt                              | S   | S   | S   |
| 1           | 28    | M      | U         | N                | Rt                              | S   | S   | S   |
| 1           | 28    | F      | U         | <b>P</b>         | Rt                              | S   | Rt  | S   |
| 1           | 29    | F      | R         | N                | S                               | S   | S   | S   |
| 1           | 29    | M      | U         | <b>P</b>         | S                               | S   | S   | S   |
| 1           | 29    | F      | R         | N                | Rt                              | S   | Rt  | S   |
| 5           | 30    | 3M,2F  | 2U,3R     | N                | S                               | S   | S   | S   |
| 1           | 30    | M      | R         | N                | Rt                              | S   | S   | S   |
| 1           | 30    | F      | U         | <b>P</b>         | S                               | S   | S   | S   |
| 1           | 31    | M      | R         | N                | S                               | S   | S   | S   |
| 3           | 32    | 2M,1F  | 1U,2R     | N                | S                               | S   | S   | S   |
| 1           | 32    | F      | U         | N                | Rt                              | S   | Rt  | S   |
| 1           | 34    | F      | R         | N                | Rt                              | S   | S   | S   |
| 6           | 35    | 3M,3F  | 3U,3R     | N                | S                               | S   | S   | S   |
| 2           | 35    | M      | R         | N                | Rt                              | S   | Rt  | S   |
| 1           | 36    | M      | U         | <b>P</b>         | S                               | S   | S   | S   |
| 1           | 36    | M      | R         | N                | S                               | S   | Rt  | S   |

|    |        |       |       |       |                   |   |    |   |
|----|--------|-------|-------|-------|-------------------|---|----|---|
| 1  | 37     | F     | R     | N     | Rt                | S | Rt | S |
| 1  | 38     | M     | R     | N     | S                 | S | S  | S |
| 2  | 38     | F     | U,R   | P     | S                 | S | S  | S |
| 1  | 40     | M     | R     | N     | S                 | S | S  | S |
| 1  | 41     | M     | U     | P     | S                 | S | S  | S |
| 5  | 42-50  | 4M,1F | R     | N     | S                 | S | S  | S |
| 1  | 50     | F     | R     | P     | S                 | S | S  | S |
| 5  | 56-78  | 3M,2F | 2U,3R | N     | S                 | S | S  | S |
| 25 | 10to58 | 14:11 | 11:14 | 8:17* | Culture negatives |   |    |   |

**Key: M=male, F=female, U=urban, R=rural, N=negative, P=positive**  
**Rt=resistant, S=susceptible, \* = HIV<sup>+</sup>:HIV<sup>-</sup>.**

**Table S3, Supplementary material, retreatment cases**  
**Drug susceptibility patterns by age, gender, residence and HIV status**

| No patients | Culture | Age | Gender | Residence | HIV | Drug susceptibility Test |     |     |     |
|-------------|---------|-----|--------|-----------|-----|--------------------------|-----|-----|-----|
|             |         |     |        |           |     | INH                      | RMP | STR | EMB |
| 1           | P       | 18  | M      | R         | N   | S                        | S   | S   | S   |
| 1           | P       | 18  | F      | U         | N   | S                        | S   | S   | S   |
| 1           | P       | 19  | F      | U         | N   | S                        | S   | S   | S   |
| 1           | P       | 20  | F      | R         | N   | S                        | S   | S   | S   |
| 1           | P       | 22  | F      | U         | P   | S                        | S   | S   | S   |
| 1           | P       | 23  | F      | U         | N   | S                        | S   | S   | S   |
| 1           | P       | 28  | M      | U         | P   | S                        | S   | S   | S   |
| 1           | P       | 30  | M      | U         | P   | S                        | S   | S   | S   |
| 1           | P       | 33  | F      | U         | N   | S                        | S   | S   | S   |
| 1           | P       | 33  | F      | U         | P   | Rt                       | S   | S   | Rt  |
| 1           | P       | 33  | M      | U         | N   | Rt                       | Rt  | Rt  | S   |
| 1           | N       | 34  | F      | R         | N   |                          |     |     |     |
| 1           | P       | 35  | M      | U         | N   | Rt                       | S   | S   | S   |
| 1           | P       | 35  | M      | U         | N   | Rt                       | Rt  | S   | S   |
| 1           | P       | 38  | F      | R         | N   | S                        | S   | S   | S   |
| 1           | P       | 40  | M      | U         | P   | S                        | S   | S   | S   |

**Key: M=male, F=female, U=urban, R=rural, N=negative, P=positive**  
**Rt=resistant, S=susceptible**
