# Supplementary material for: Prevalence of Tuberculosis, Drug Susceptibility Testing, and Genotyping of Mycobacterial Isolates from Pulmonary Tuberculosis Patients in Dessie, Ethiopia
Source: Hindawi journal article supplement (doi:10.1155/2015/215015), 2015-01-01
Supplement: f1 [file 215015.f1.docx]

Table S1: Supplementary material. Socio demographic and clinical characteristics of the studyparticipants

Variable Number[%]

Gender

Male 80[55.6]

Female 64[44.4]

Age

10-20 31[21.5]

21-30 66[45.8]

31-40 32[22.2]

41-78 15[10.4]

Contact with TB patient

Yes 29[20.1]

No 115[79.9]

History of previous TB treatment

Yes 16[11.1]

No 128[88.9]

Length of stay/cough before seeking health care

2 weeks 13[9]

3 weeks 33[23]

4 weeks 40[27.6]

5-10 weeks 31[21.5]

> 10 weeks 27[18.7]

HIV status

Negative (N=119)

Male – No(N:R)a 70(66:4)[48.6]

Female – No(N:R)a 49(42:7)[34.0]

Positive (N=25)

Male – No(N:R)a 10(7:3)[6.9]

Female – No(N:R)a 15(13:2)[10.4]

a N = new case, R = Retreatment case

| **Table S2, Supplementary material, new cases** | | | | | | |  |  |
| --- | --- | --- | --- | --- | --- | --- | --- | --- |
| **Drug susceptibility patterns by age, gender, residence and HIV status** | | | | | | |  |  |
|  |  |  |  |  |  | **Drug susceptibility test result** | | |
| **No patients** | **Age** | **Gender** | **Residence** | **HIV** | **INH** | **RMP** | **STR** | **EMB** |
| 1 | 13 | M | U | N | S | S | S | **Rt** |
| 18 | 14-20 | 8M,10F | 3U,15R | N | S | S | S | S |
| 1 | 18 | M | U | N | S | S | **Rt** | S |
| 1 | 20 | F | R | N | S | S | S | **Rt** |
| 2 | 21 | M,F | R | N | S | S | S | S |
| 4 | 22 | 2M,2F | 1U,3R | N | S | S | S | S |
| 1 | 22 | M | R | N | **Rt** | S | S | S |
| 2 | 23 | M | U,R | N | S | S | S | S |
| 1 | 23 | M | U | N | **Rt** | S | **Rt** | S |
| 2 | 24 | M,F | R | N | S | S | S | S |
| 9 | 25 | 3M,6F | 5U,4R | N | S | S | S | S |
| 3 | 25 | 1M,2F | 1U,2R | **P (1M,2F)** | S | S | S | S |
| 1 | 26 | F | R | N | S | S | S | S |
| 3 | 27 | M | 1U,2R | N | S | S | S | S |
| 1 | 27 | M | U | N | S | S | **Rt** | S |
| 1 | 27 | F | R | **P** | S | S | S | S |
| 6 | 28 | 3M,3F | 4U,2R | N | S | S | S | S |
| 1 | 28 | M | R | N | **Rt** | S | S | S |
| 1 | 28 | M | U | N | **Rt** | S | S | S |
| 1 | 28 | F | U | **P** | **Rt** | S | **Rt** | S |
| 1 | 29 | F | R | N | S | S | S | S |
| 1 | 29 | M | U | **P** | S | S | S | S |
| 1 | 29 | F | R | N | **Rt** | S | **Rt** | S |
| 5 | 30 | 3M,2F | 2U,3R | N | S | S | S | S |
| 1 | 30 | M | R | N | **Rt** | S | S | S |
| 1 | 30 | F | U | **P** | S | S | S | S |
| 1 | 31 | M | R | N | S | S | S | S |
| 3 | 32 | 2M,1F | 1U,2R | N | S | S | S | S |
| 1 | 32 | F | U | N | **Rt** | S | **Rt** | S |
| 1 | 34 | F | R | N | **Rt** | S | S | S |
| 6 | 35 | 3M,3F | 3U,3R | N | S | S | S | S |
| 2 | 35 | M | R | N | **Rt** | S | **Rt** | S |
| 1 | 36 | M | U | **P** | S | S | S | S |
| 1 | 36 | M | R | N | S | S | **Rt** | S |
| 1 | 37 | F | R | N | **Rt** | S | **Rt** | S |
| 1 | 38 | M | R | N | S | S | S | S |
| 2 | 38 | F | U,R | **P** | S | S | S | S |
| 1 | 40 | M | R | N | S | S | S | S |
| 1 | 41 | M | U | **P** | S | S | S | S |
| 5 | 42-50 | 4M,1F | R | N | S | S | S | S |
| 1 | 50 | F | R | **P** | S | S | S | S |
| 5 | 56-78 | 3M,2F | 2U,3R | N | S | S | S | S |
| 25 | 10to58 | 14:11 | 11:14 | 8:17* | Culture negatives | | | |
|  |  |  |  |  |  |  |  |  |
| **Key: M=male, F=female, U=urban, R=rural, N=negative, P=positive** | | | | | | |  |  |
| **Rt=resistant, S=susceptible** | | | |  |  |  |  |  |

| **Table S3, Supplementary material, retreatment cases** | | | | | | |  |  |  |
| --- | --- | --- | --- | --- | --- | --- | --- | --- | --- |
| **Drug susceptibility patterns by age, gender, residence and HIV status** | | | | | | |  |  |  |
|  |  |  |  |  |  | **Drug sensitivity Test** | | | |
| **No patients** | **Culture** | **Age** | **Gender** | **Residence** | **HIV** | **INH** | **RMP** | **STR** | **EMB** |
| 1 | P | 18 | M | R | N | S | S | S | S |
| 1 | P | 18 | F | U | N | S | S | S | S |
| 1 | P | 19 | F | U | N | S | S | S | S |
| 1 | P | 20 | F | R | N | S | S | S | S |
| 1 | P | 22 | F | U | **P** | S | S | S | S |
| 1 | P | 23 | F | U | N | S | S | S | S |
| 1 | P | 28 | M | U | **P** | S | S | S | S |
| 1 | P | 30 | M | U | **P** | S | S | S | S |
| 1 | P | 33 | F | U | N | S | S | S | S |
| 1 | P | 33 | F | U | **P** | **Rt** | S | S | **Rt** |
| 1 | P | 33 | M | U | N | **Rt** | **Rt** | **Rt** | S |
| 1 | N | 34 | F | R | N |  |  |  |  |
| 1 | P | 35 | M | U | N | **Rt** | S | S | S |
| 1 | P | 35 | M | U | N | **Rt** | **Rt** | S | S |
| 1 | P | 38 | F | R | N | S | S | S | S |
| 1 | P | 40 | M | U | **P** | S | S | S | S |
| **Key: M=male, F=female, U=urban, R=rural, N=negative, P=positive** | | | | | | | | |  |
| **Rt=resistant, S=susceptible** | | | |  |  |  |  |  |  |
